# Supplementary material
Source: PubMed Central journal article supplement (PMC3416448)
Supplement: AEM.00804-12_zam999103475so1.pdf [file AEM.00804-12_zam999103475so1.pdf]

**Table S1.-** Bacterial strains and plasmids used in this work.

| Item                                          | Genotype or phenotype                                                                                                                                                                  | Source or reference      |
|-----------------------------------------------|----------------------------------------------------------------------------------------------------------------------------------------------------------------------------------------|--------------------------|
| Strains                                       |                                                                                                                                                                                        |                          |
| <i>Bifidobacterium breve</i> UCC2003          | Isolate from nursling stool                                                                                                                                                            | (27)                     |
| <i>Bifidobacterium breve</i> UCC2003-phoP-481 | pORI19- <i>tetW-phoP</i> insertion mutant of UCC2003                                                                                                                                   | This study               |
| <i>Escherichia coli</i> TOP10                 | F' <i>mcrA</i> Δ( <i>mrr-hsdRMS-mcrBC</i> ) F80 <i>lacZ</i> ΔM15 Δ <i>lacX74 recA1 deoR araD139</i> Δ( <i>ara-leu</i> )7697 <i>galU galK rspL</i> (Str <sup>r</sup> ) <i>endA1nupG</i> | Invitrogen, Carlsbad, CA |
| <i>Escherichia coli</i> EC1010                | <i>E. coli</i> JM101 with <i>repA</i> from pWV01 integrated in chromosome, km <sup>r</sup>                                                                                             | (21)                     |
| <i>Escherichia coli</i> XL1-blue              | Δ( <i>mcrA</i> )183 Δ( <i>mcrCB-hsdSMR-mrr</i> )173 <i>endA1 supE44 thi-1 recA1 gyrA96 relA1 lac</i> [F' <i>proAB lacI</i> <sup>q</sup> ΔM15 <i>Tn10</i> (Tet <sup>r</sup> )]          | Stratagen                |
| <i>Escherichia coli</i> M15                   | <i>lac, ara, gal, mtl, recA</i> <sup>+</sup> , <i>uvr</i> <sup>+</sup> [pREP4, <i>lacI</i> , km <sup>r</sup> ]                                                                         | Quiagen                  |
| <i>Lactococcus lactis</i> NZ9000              | MG1363, nisin-inducible overexpression host; <i>pepN::nisRK</i>                                                                                                                        | (6)                      |
| Plasmids                                      |                                                                                                                                                                                        |                          |
| pAM5                                          | pBC1-pUC19 Tet <sup>r</sup> [ <i>tetW</i> ]                                                                                                                                            | (2)                      |
| pORI19                                        | Em <sup>r</sup> , <i>repA</i> <sup>-</sup> , <i>ori+</i> , cloning vector                                                                                                              | (21)                     |
| pORI19-phoP                                   | Internal 481 bp fragment of <i>phoP</i> cloned in pORI19                                                                                                                               | This work                |
| pORI19-tet-phoP                               | Internal 481 bp fragment of <i>phoP</i> and <i>tetW</i> cloned in pORI19                                                                                                               | This work                |
| pCR4-TOPO                                     | Ap <sup>r</sup> , <i>lacZα</i> ; TA cloning vector                                                                                                                                     | Invitrogen               |

---

|                     |                                                                                                                                        |            |
|---------------------|----------------------------------------------------------------------------------------------------------------------------------------|------------|
| pCR4-TOPO-phoP      | Ap <sup>r</sup> , pCR4-TOPO containing <i>phoP</i> gene of <i>B. breve</i> UCC2003                                                     | This study |
| pCR4-TOPO-phoPR-Pro | Ap <sup>r</sup> , pCR4-TOPO derivative carrying the <i>phoPR</i> promoter                                                              | This study |
| pCR4-TOPO-pstS-Pro  | Ap <sup>r</sup> , pCR4-TOPO derivative carrying the <i>pstS</i> promoter                                                               | This study |
| pCR4-TOPO-pit-Pro   | Ap <sup>r</sup> , pCR4-TOPO derivative carrying the <i>pit</i> promoter                                                                | This study |
| pNZ8048             | Cm <sup>r</sup> , nisin-inducible translational fusion vector                                                                          | (6)        |
| pNZ8048:phoP        | Cm <sup>r</sup> ; pNZ8048 derivative containing translational fusion of <i>phoP</i> encoding DNA fragment to nisin-inducible promoter. | This study |
| pNZ44               | Cm <sup>r</sup> , pNZ8048 containing constitutive P44 promoter from <i>L. lactis</i> chromosome                                        | (28)       |
| pNZ44:phoP          | Cm <sup>r</sup> ; pNZ44 derivative containing translational fusion of <i>phoP</i> encoding DNA fragment to p44 promoter.               | This study |
| pNZ272              | Cm <sup>r</sup> , pSH71 derivative containing promoterless glucuronidase gene for promoter screening.                                  | (35)       |
| pNZ272:pho          | pNZ272 derivative carrying the <i>phoPR</i> promoter                                                                                   | This study |
| pNZ272:pst          | pNZ272 derivative carrying the <i>pstS</i> promoter                                                                                    | This study |
| pNZ272:pit          | pNZ272 derivative carrying the <i>pit</i> promoter                                                                                     | This study |

---

Ap<sup>r</sup>, Em<sup>r</sup>, Km<sup>r</sup> Str<sup>r</sup> and Tet<sup>r</sup>, resistance to ampicillin, erythromycin, kanamycin, streptomycin and tetracycline, respectively.

**Table S2.** Oligonucleotides used in this work

| Purpose                                               | Primer       | Sequence (5'→3')                                                         |
|-------------------------------------------------------|--------------|--------------------------------------------------------------------------|
| Cloning of internal fragment of <i>phoP</i> in pORI19 | phoPKOF      | ctagt <u>gctgcagg</u> gtatgacgtgtccgctgctg                               |
|                                                       | phoPKOR      | gtcagtt <u>ctagacgg</u> tcaatcagctgatgccg                                |
| Cloning <i>phoP</i> gene in pNZ44                     | RrFoefor     | a <u>acatggc</u> caggaaacaacagggtaatggactc                               |
|                                                       | RrFoerev     | aat <u>ctagagg</u> tcgcctttcatcatccgcaaacg                               |
| Clonig promoter region of <i>phoPR</i> in pNZ272      | p2CSFfor     | <u>ctgcagat</u> gatctgccagatatccat                                       |
|                                                       | p2CSFrev     | <u>ggatccgg</u> aaagcaaggacaaggacta                                      |
| Clonig promoter region of <i>pstS</i> in pNZ272       | pPstfor      | <u>ggctgcag</u> ggaagcggaatcagtgaggagctgtcggtcgtc                        |
|                                                       | pPstRev      | <u>ggaggatcc</u> ggaattcgagctgctcgaatacctgatgcagaa                       |
| Clonig promoter region of <i>pit</i> in pNZ272        | pPitfor      | <u>ggctgcag</u> ccaagtcacgggcatattc                                      |
|                                                       | pPitrev      | <u>ggaggatcc</u> acgccgaggaagttaaagatgg                                  |
| Cloning <i>phoP</i> gene in pNZ8048                   | Bbr1683fNco1 | tgcac <u>gccatgg</u> cccatcaccatcaccatcaccatca<br>cacgcgattctcatcgtcgaag |
|                                                       | Bbr1683rXba1 | tgcgcat <u>ctagatt</u> actccaccggggcgtcgatc                              |
| <i>tetW</i> gene amplification                        | tetWf        | tcagct <u>gtcgac</u> atgctcatgtacgtaag                                   |
|                                                       | tetWr        | gcgac <u>ggtcgac</u> cattaccttctgaaacat                                  |
| qRT-PCR primers                                       | psTS-7F      | atggcaccatcggttacg                                                       |
|                                                       | psTS-7R      | taggagtcgccgaccttg                                                       |

|                                                       |              |                        |
|-------------------------------------------------------|--------------|------------------------|
|                                                       | 1573-31F     | gtgaagctgctcgccaag     |
|                                                       | 1573-31R     | gaatgtggaggccagacg     |
|                                                       | rnpA-59L     | GCATCGTTCTCATCGTTGG    |
|                                                       | rnpA-59R     | cgccttacgagccacttt     |
| Primers for <i>pstS</i> upstream region amplification | ptsSird1f    | tggctacaagatcgacgc     |
|                                                       | ptsSird1r    | caatggagcgaatgaggatg   |
|                                                       | ptsSird2f    | catgatggcctctttcccgcg  |
|                                                       | ptsSird2r    | ggaggagctgtcggtcgtg    |
|                                                       | ptsSird3f    | cttctgtttactgatttc     |
|                                                       | ptsSird3r    | gcttcgacggcggactgc     |
| Primer for <i>pstC</i> upstream region amplification  | ptsCirdf     | caaggccatcaagaccaag    |
|                                                       | ptsCirdr     | gccgtttgtcttgcaactc    |
| Primers for <i>phoU</i> upstream region amplification | Bbr1573ird1f | gaaacggcatcgatgcatcac  |
|                                                       | Bbr1573ird1r | taacgcgcatcttccagcc    |
|                                                       | Bbr1573ird2f | gcacgccgataacatgaatttc |
|                                                       | Bbr1573ird2r | catgcggtcgaggatcatc    |
|                                                       | Bbr1573ird3f | ccattatctacattgaag     |
|                                                       | Bbr1573ird3r | cacggttgagcggcttc      |
|                                                       | Bbr1573ird1f | gaaacggcatcgatgcatcac  |
| Primers for <i>phoR</i> upstream region amplification | Bbr1684ird1f | gcaaggacaaggactacg     |

|                                                |              |                                  |
|------------------------------------------------|--------------|----------------------------------|
|                                                | Bbr1684ird1r | gcaagcaccacaaacacg               |
|                                                | Bbr1684ird2f | gatattgtgctcccgtg                |
|                                                | Bbr1684ird2r | gacacacgcccggaaacac              |
|                                                | Bbr1684ird3f | cttgctatattcgccctg               |
| Others putatives target genes promoter regions | p1811for     | tggcagcaccatttgaggttgcttg        |
|                                                | p1811rev     | cgccactttcccgggaacgtgtcgctg      |
|                                                | p0824for     | gactgacctgtcggcatggaacagccttg    |
|                                                | p0824rev     | gattcggacgtaagaccttatggtg        |
|                                                | p1389for     | ggtcgacacgccaagtaccgaggacagct    |
|                                                | p1390rev     | aggcgatcacttcattgaacggatatattca  |
|                                                | patpBfor     | tcgttcgcacagtgagctgtaatttgttc    |
|                                                | patpBrev     | gttgactgagggcagatgagcgccctcgt    |
|                                                | p1506for     | aagtgctctccttttgagctcgttcattaacc |
|                                                | p1506rev     | caggagtggcgggatcgagaaatagggga    |
|                                                | pczcDfor     | tttctctcgagccgattcgctcacatcg     |
|                                                | pczcDrev     | agggatccggttaagcacggcgatgatgactt |
|                                                | p1771for     | ttcactcgatgctcccgttgcgaaagctgac  |
|                                                | p1771rev     | ctgccgtattcgtggcatgcgcggttcgt    |
|                                                | p1894for     | atacagcatgccgttcggttgaaaa        |
|                                                | p1894rev     | ccgaacgcaaggcccccgaacggc         |
| <i>pstS</i> promoter primer extension analysis | ptsSird1r    | caatggagcgaatgaggatg             |
|                                                | ptsSird2r    | ggaggagctgtcggctcgtg             |
| <i>phoR</i> promoter primer extension analysis | Bbr1684ird1r | gcaagcaccacaaacacg               |

|                                             |              |                                                   |
|---------------------------------------------|--------------|---------------------------------------------------|
|                                             | Bbr1684ird2r | gacacacgcccggaaacac                               |
| Amplification of DNA for sequencing ladders | p2CSFfor     | <u>ctgcagatgatctgccagatatccat</u>                 |
|                                             | p2CSFrev     | <u>ggatccggaaagcaaggacaaggacta</u>                |
|                                             | pPstfor      | <u>ggctgcaggggaagcggaatcagtgaggagctgtcggtcgtc</u> |
|                                             | pPstRev      | <u>ggaggatccggaattcgagctgctcgaatacctgatgcagaa</u> |

---

<sup>a</sup> Underlined oligonucleotide sequences show artificial restriction enzyme sites introduced for cloning.

**Table S3****Basal Medium –Dissolve in 850 ml dH2O**

| <b>Chemically defined medium</b> |        | <b>Phosphate Starvation Medium</b> |        |
|----------------------------------|--------|------------------------------------|--------|
| $\beta$ -glycerophosphate        | 19 g   | MOPS                               | 10 g   |
| K <sub>2</sub> HPO <sub>4</sub>  | 3 g    |                                    |        |
| KH <sub>2</sub> PO <sub>4</sub>  | 3 g    |                                    |        |
| Sodium acetate                   | 1 g    | Sodium acetate                     | 1 g    |
| tri-ammonium citrate             | 0.6 g  | tri-ammonium citrate               | 0.6 g  |
| ascorbic acid                    | 0.5 g  | ascorbic acid                      | 0.5 g  |
| tyrosine                         | 0.25 g | tyrosine                           | 0.25 g |
| Tween 80                         | 0.1%   | Tween 80                           | 0.1%   |
| Glycerol                         | 0.1%   | Glycerol                           | 0.1%   |

**Trace metals per litre:**

50 mg MgSO<sub>4</sub>·7H<sub>2</sub>O  
 10 mg MnSO<sub>4</sub>·4H<sub>2</sub>O (pink)  
 5 mg FeSO<sub>4</sub>·7H<sub>2</sub>O (green)  
 5 mg CuSO<sub>4</sub>·5H<sub>2</sub>O  
 0.5 mg CoCl<sub>2</sub>  
 0.15 mg ZnSO<sub>4</sub>·7H<sub>2</sub>O

**Vitamins per litre:**

10 mg p-aminobenzoic acid  
 5 mg inosine  
 5 mg thymidine  
 2.5 mg 6,8-thioctic acid  
 2.5 mg biotin  
 2.0 mg pyridoxine-HCl  
 1.0 mg folic acid  
 1.0 mg nicotinic acid  
 1.0 mg Ca-(D<sup>+</sup>)-pantothenate  
 1.0 mg riboflavin  
 1.0 mg thiamine-HCl  
 1.0 mg cobalamin

**Bases (in 0.1N NaOH) per litre:**

0.1 mg adenine  
 0.1 mg guanine  
 0.1 mg uracil  
 0.1 mg xanthine

**Casamino acids-5 g/L****Sugar source (10% or 20% stock)**

Add 100 ml or 50 ml per litre (1 % or 0.5% final concentration)

**Cys-HCl (0.05 % final conc.)**

Add ~8.3 ml (6 % stock) per litre of medium

**Fatty acids (100 % stock)**

Add at final conc. of 10 µg/ml

pH 6.8 and filter sterilise

For growth experiments the phosphate starvation medium was supplemented with 20 mM, 10 mM, 1 mM and 0.1 mM phosphate from a 100 mM potassium phosphate stock solution (pH7.0)

## References

2. **Alvarez-Martin, P., M. O'Connell-Motherway, D. van Sinderen, and B. Mayo.** 2007. Functional analysis of the pBC1 replicon from *Bifidobacterium catenulatum* L48. *Appl. Microbiol. Biotechnol.* **76**:1395–1402.
6. **Diniz, M. M., C. L. Goulart, L. C. Barbosa, J. Farache, L. M. Lery, A. B. Pacheco, P. M. Bisch and W. M. von Krüger.** 2011. Fine-tuning control of *phoBR* expression in *Vibrio cholerae* by binding of *phoB* to multiple *pho* boxes. *J. Bacteriol.* **193**: 6929-6938.
21. **Leahy, S. C., D. G. Higgins, G. F. Fitzgerald, and D. van Sinderen.** 2005. Getting better with bifidobacteria. *J. Appl. Microbiol.* **98**:1303-1315.
27. **McGrath S., G. F. Fitzgerald, and D van Sinderen.** 2001. Improvement and optimization of two engineered phage resistance mechanisms in *Lactococcus lactis*. *Appl. Environ. Microbiol.* **67**:608-16.
28. **Mitrophanov A. Y., and E. A. Groisman.** 2008. Signal integration in bacterial two-component regulatory systems. *Genes Dev.* **22**:2601-2611.
35. **Pokusaeva, K., A. R. Neves, A. Zomer, M. O'Connell-Motherway, J. MacSharry, P. Curley, G. F. Fitzgerald, and D. van Sinderen.** 2010. Ribose utilization by the human commensal *Bifidobacterium breve* UCC2003. *Microbial Biotechnology* **3**:311–323.
