# Supplementary material
Source: PubMed Central journal article supplement (PMC3416448)

**Figure S1.** SDS-PAGE analysis of PhoP-His purification. Lane 1, protein molecular weight marker (7KDa to 175 KDa); lanes 2, 3, 4, 5, 6, eluted fractions of purified PhoP-His protein.

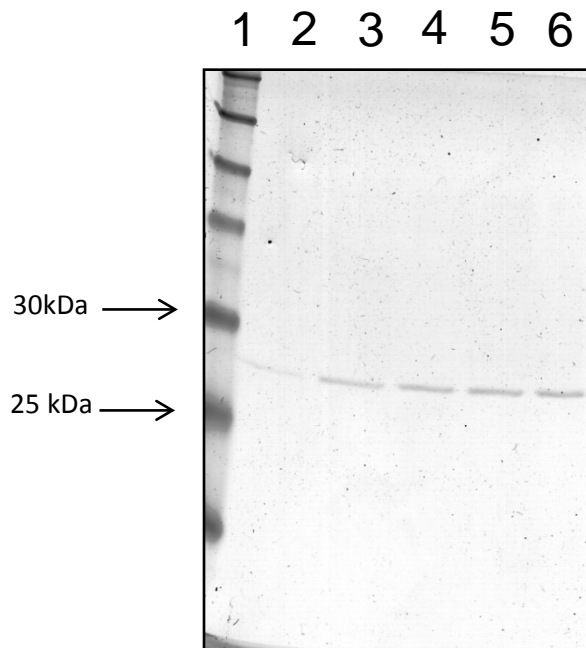

Supplement: AEM.00804-12_zam999103475so2.pdf [file AEM.00804-12_zam999103475so2.pdf]
